# Supplementary material for: Single metal atoms regulated flexibly by a 2D InSe substrate for CO2 reduction electrocatalysts
Source: Royal Society of Chemistry journal article supplement (doi:10.1039/c9ta00627c), 2019-01-01
Supplement: c9ta00627c3.pdf [file c9ta00627c3.pdf]

## Supporting Information

### Single Metal Atom Regulated Flexibly by 2D InSe substrate for CO<sub>2</sub> reduction electrocatalyst

Chen Xu Zhao,<sup>1</sup> Guo Xu Zhang,<sup>2</sup> Wang Gao,<sup>1\*</sup> and Qing Jiang<sup>1\*</sup>

<sup>1</sup>Key Laboratory of Automobile Materials, Ministry of Education, and Department of Materials Science and Engineering, Jilin university

<sup>2</sup>School of Chemistry and Chemical Engineering, Harbin Institute of Technology, West Dazhi 92, 150001, Harbin, P. R. China

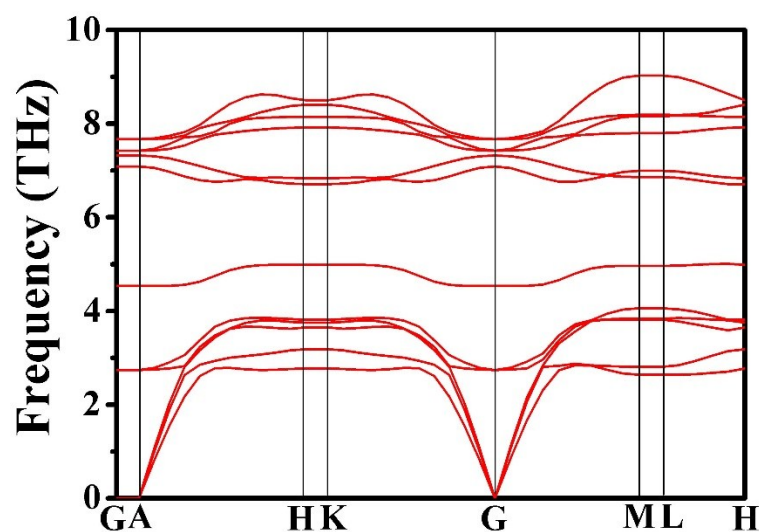

Fig. S1 The phonons dispersion curves of a fully relax 2D InSe monolayer.

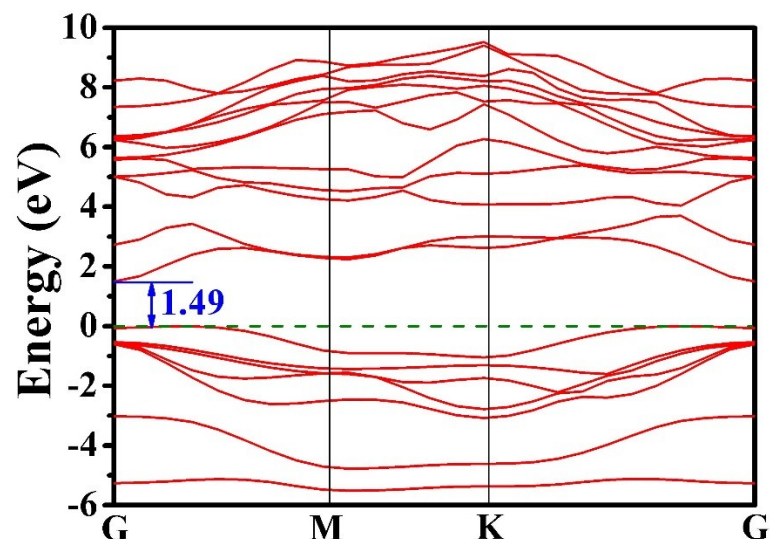

Fig.S2 Band structure of a fully relax 2D InSe monolayer.



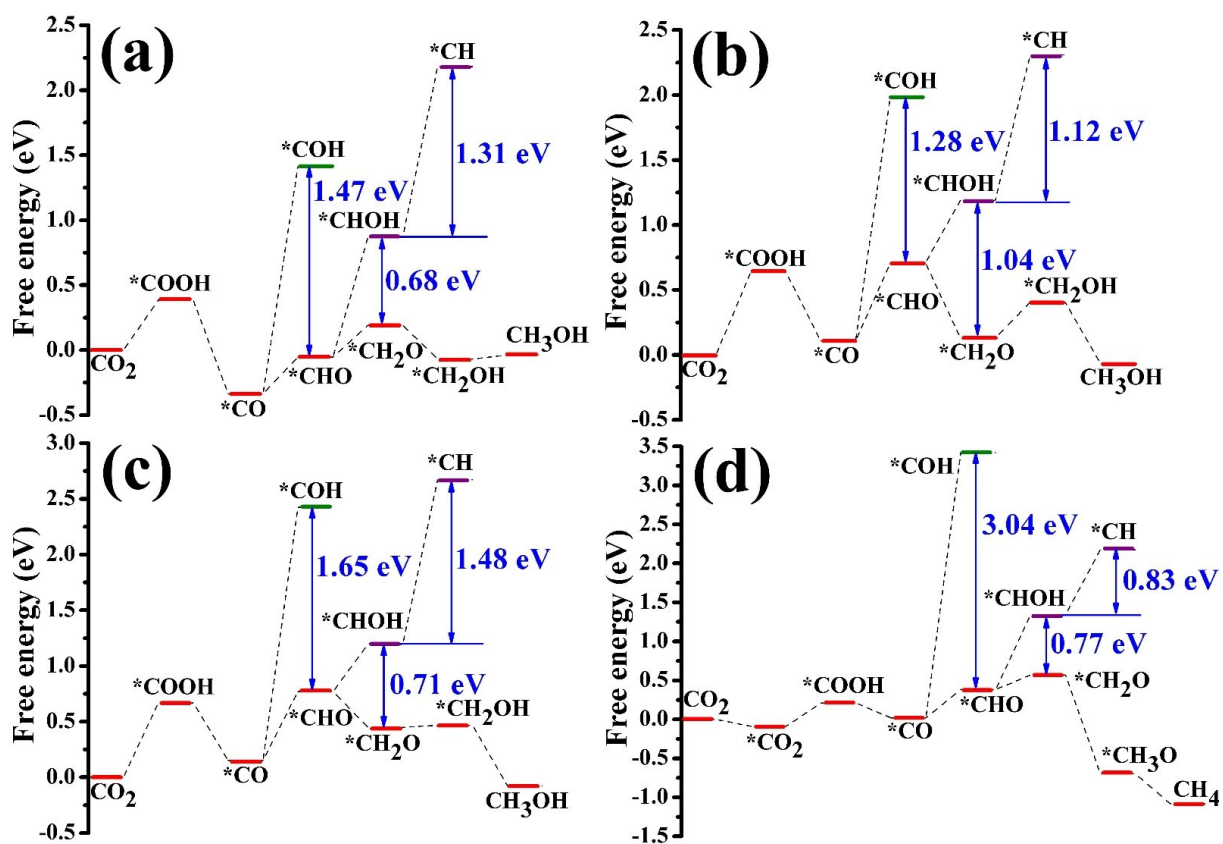

**Fig. S5** Free energy profiles of CRR on (a) Rh@2DInSe, (b) Mn@2DInSe, (c) Cu@2DInSe, and (d) Cr@2DInSe at zero applied voltage (vs RHE) and 298.15K.

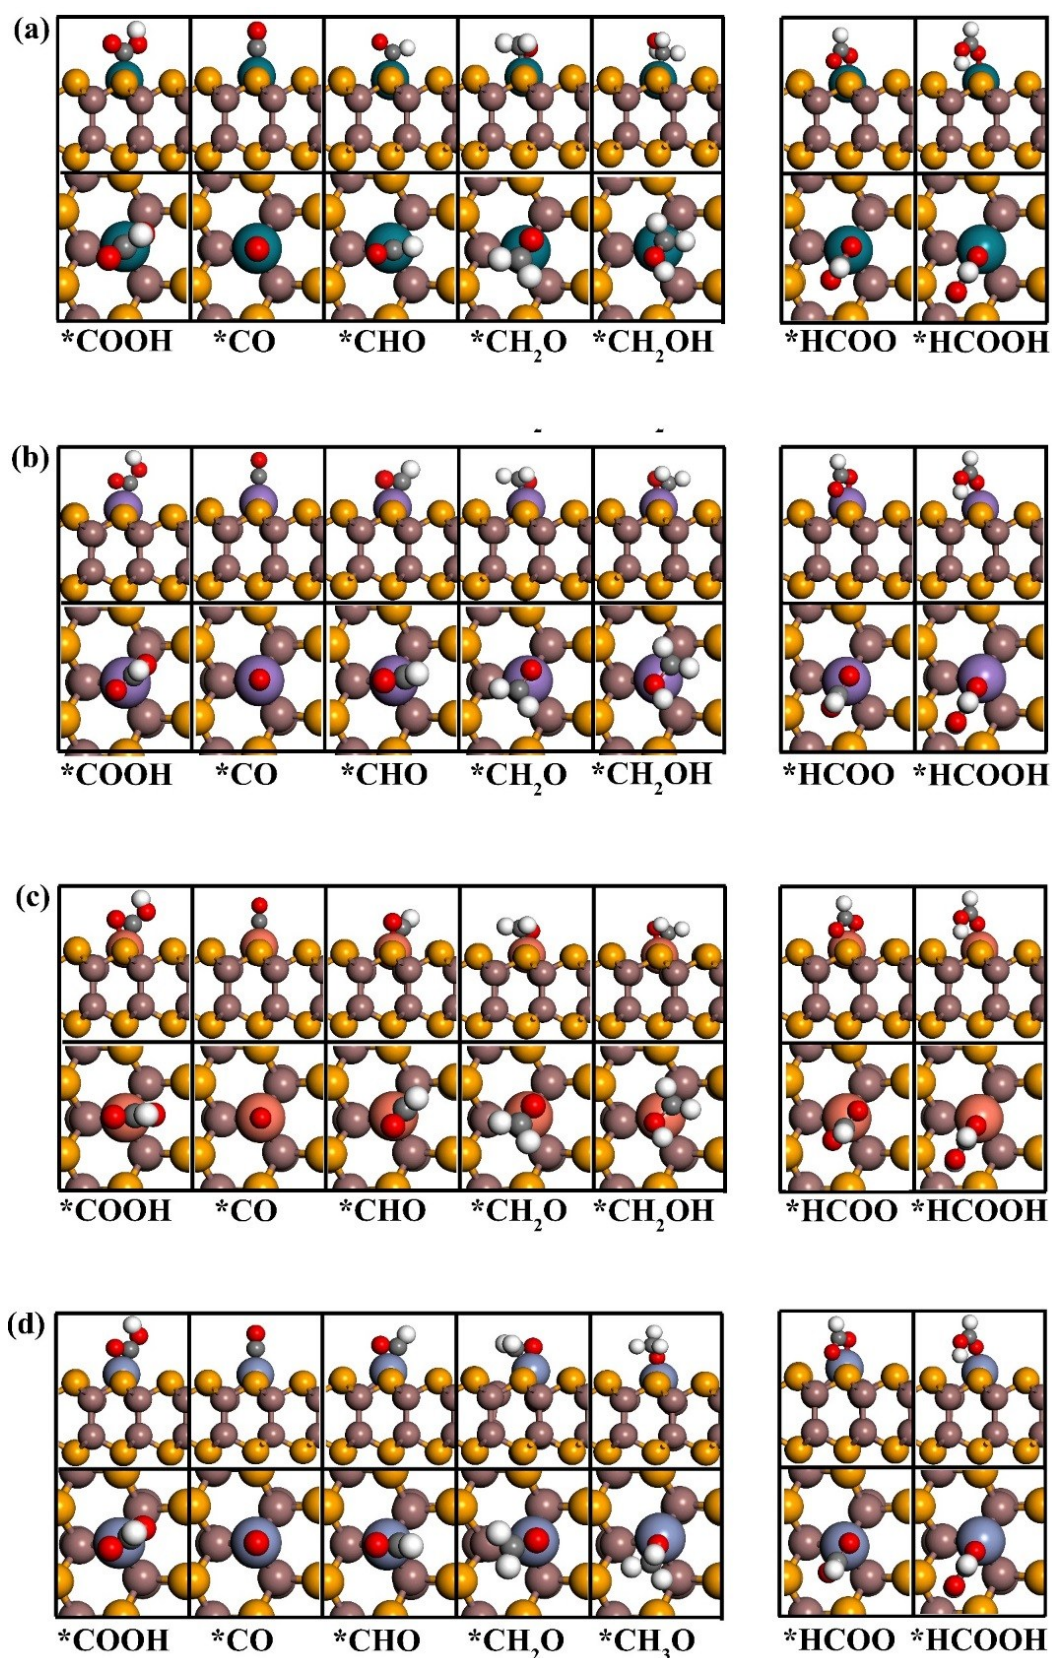

Fig. S6 Configurations of the intermediates along the reaction path on the active sites of (a) Rh@2DInSe, (b) Mn@2DInSe, (c) Cu@2DInSe, and (d) Cr@2DInSe.

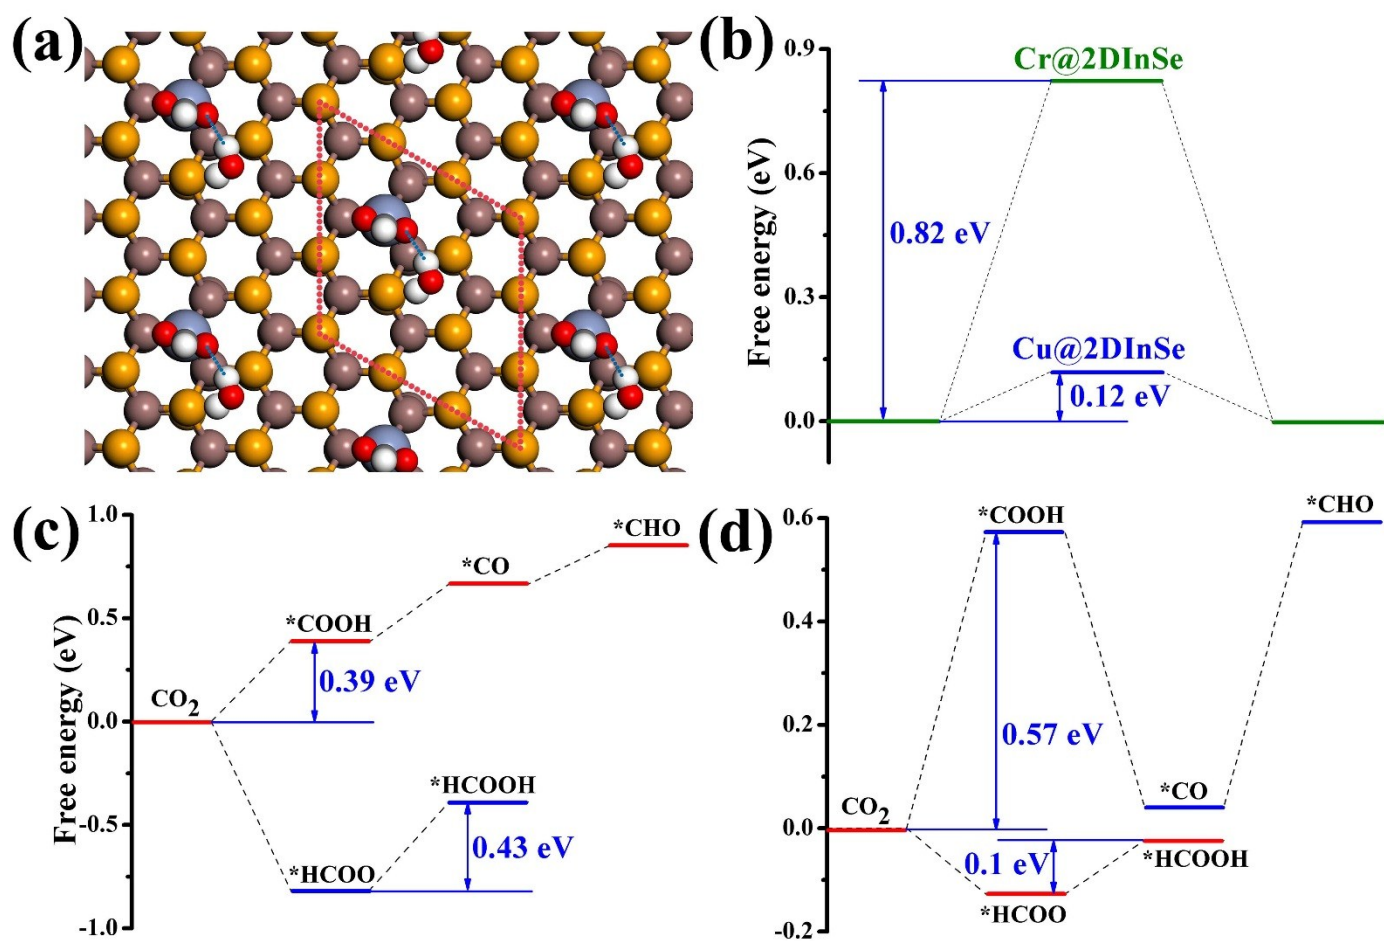

Fig. S7 (a) Configuration of HCOO adsorption on Cr@2DInSe with one water molecule. The blue dashed line denotes hydrogen bond; Free energy profiles of (b) HER on Cr@2DInSe and Cu@2DInSe; Free energy profiles of CRR on (c) Cr@2DInSe and (d) Cu@2DInSe.

**Table S1** The adsorption energies ( $E_{ad}$ ) of different intermediates. 1-16 denotes different M@2DInSe systems. 17-26 denotes different transition metal systems.

|    | $E_{ad}$ (eV)    |       |       |       |                    |                    |                     |
|----|------------------|-------|-------|-------|--------------------|--------------------|---------------------|
|    | *CO <sub>2</sub> | *COOH | *CO   | *CHO  | *CH <sub>2</sub> O | *CH <sub>3</sub> O | *CH <sub>2</sub> OH |
| 1  | -0.06            | -2.17 | -1.08 | -2    |                    |                    |                     |
| 2  | -0.08            | -2.27 | -0.62 | -1.79 |                    |                    |                     |
| 3  | -0.36            | -3.16 | -1.84 | -3.4  |                    |                    |                     |
| 4  | -0.33            | -2.75 | -1.38 | -3.06 | -0.93              | -2.16              | -2.82               |
| 5  | -0.17            | -1.79 | -0.93 | -1.64 |                    |                    |                     |
| 6  | -0.19            | -2.07 | -0.7  | -1.56 |                    |                    |                     |
| 7  | -0.25            | -3.45 | -1.98 | -3.52 |                    |                    |                     |
| 8  | -0.18            | -2.37 | -0.53 |       |                    |                    |                     |
| 9  | -0.44            | -2.65 | -1.19 | -2.35 | -1.26              | -3.17              | -2.41               |
| 10 | -0.48            | -2.91 | -1.03 | -2.54 | -1.45              | -3.42              | -2.55               |
| 11 | -0.56            | -2.93 | -1.46 | -2.91 |                    |                    |                     |
| 12 | -0.54            | -2.9  | -1.88 | -2.83 |                    |                    |                     |
| 13 | -0.49            | -3.01 | -1.71 | -3.03 |                    |                    |                     |
| 14 | -0.34            | -2.39 | -1.42 | -2.3  |                    |                    |                     |
| 15 | -0.24            | -2.47 | -1.11 | -2.04 | -0.78              | -2.77              | -2.34               |
| 16 | -0.24            | -2.43 | -0.77 | -1.96 |                    |                    |                     |
| 17 |                  | -1.76 | -0.15 |       |                    |                    |                     |
| 18 |                  | -1.81 | -0.17 |       |                    |                    |                     |
| 19 |                  | -2.05 | -0.44 |       |                    |                    |                     |
| 20 |                  | -2.11 | -0.56 |       |                    |                    |                     |
| 21 |                  | -2.5  | -1.25 |       |                    |                    |                     |
| 22 |                  | -3.24 | -2.07 |       |                    |                    |                     |
| 23 |                  | -3.31 | -2.17 |       |                    |                    |                     |
| 24 |                  | -3.29 | -2.24 |       |                    |                    |                     |
| 25 |                  | -4.47 | -2.57 |       |                    |                    |                     |
| 26 |                  | -4.32 | -3.81 |       |                    |                    |                     |

1: Pt@2DInSe; 2: Au@2DInSe; 3: Ru@2DInSe; 4: Rh@2DInSe; 5: Pd@2DInSe; 6: Ag@2DInSe; 7: Ir@2DInSe; 8: Cd@2DInSe; 9: Mn@2DInSe; 10: Cr@2DInSe; 11: V@2DInSe; 12: Fe@2DInSe; 13: Co@2DInSe; 14: Ni@2DInSe; 15: Cu@2DInSe; 16: Zn@2DInSe; 17: Cd; 18: Zn; 19: Ag; 20: Au; 21: Cu; 22: Co; 23: Pt; 24: Ni; 25: Cr; 26: Sc

**Table S2** Reaction free energies ( $G_r$ ) of different reaction steps in various systems. a-i denote different reaction steps. 1-5 denote different M@2DInSe systems.

|   | $G_r$ (eV) |       |      |       |       |       |       |       |       |       |       |      |       |       |       |
|---|------------|-------|------|-------|-------|-------|-------|-------|-------|-------|-------|------|-------|-------|-------|
|   | a          | b     | c    | d     | e     | f     | g     | h     | i     | j     | k     | l    | m     | n     | o     |
| 1 | 0.39       | -0.72 | 0.28 | 0.24  | 0.25  | 0.16  | -0.26 | 0.03  | -0.48 | 0.63  | -0.74 | 0.12 | -0.03 | 0.03  | 0.12  |
| 2 | 0.63       | -0.52 | 0.60 | -0.58 | -0.62 | 0.37  | 0.28  | -0.46 | 0.43  | -0.52 | 0.17  | 0.42 | 0.48  | -0.48 | 0.06  |
| 3 | 0.67       | -0.52 | 0.62 | -0.28 | -0.51 | 0.91  | 0.02  | -0.54 | -0.02 | -0.37 | 0.11  | 0.02 | 0.22  | -0.22 | 0.07  |
| 4 | 0.33       | -0.19 | 0.36 | 0.19  | -1.27 | -0.38 | -0.33 | -0.30 | 0.63  | -0.72 | 0.41  | 0.53 | 0.43  | -0.43 | -0.09 |
| 5 | 0.78       | -0.28 | 0.50 |       |       |       |       |       |       |       |       |      |       |       |       |

1: Mn@2DInSe; 2: Cu@2DInSe; 3: Rh@2DInSe; 4: Cr@2DInSe; 5: Zn@2DInSe

a: \*CO<sub>2</sub> (CO<sub>2</sub>) + H<sup>+</sup> + e<sup>-</sup> → \*COOH; b: \*COOH + H<sup>+</sup> + e<sup>-</sup> → \*CO + H<sub>2</sub>O; c: \*CO + H<sup>+</sup> + e<sup>-</sup> → \*CHO; d: \*CHO + H<sup>+</sup> + e<sup>-</sup> → \*CH<sub>2</sub>O; e: \*CH<sub>2</sub>O + H<sup>+</sup> + e<sup>-</sup> → \*CH<sub>3</sub>O; f: \*CH<sub>3</sub>O + H<sup>+</sup> + e<sup>-</sup> → CH<sub>4</sub>; g: \*CH<sub>2</sub>O + H<sup>+</sup> + e<sup>-</sup> → \*CH<sub>2</sub>OH; h: \*CH<sub>2</sub>OH + H<sup>+</sup> + e<sup>-</sup> → CH<sub>3</sub>OH; i: \*CH<sub>3</sub>O + H<sup>+</sup> + e<sup>-</sup> → CH<sub>3</sub>OH; j: \*CO<sub>2</sub> + H<sup>+</sup> + e<sup>-</sup> → \*HCOO; k: \*HCOO + H<sup>+</sup> + e<sup>-</sup> → \*HCOOH; l: \*HCOOH → \* + HCOOH; m: \* + H<sup>+</sup> + e<sup>-</sup> → \*H; n: \*H + H<sup>+</sup> + e<sup>-</sup> → H<sub>2</sub>; o: \* + CO<sub>2</sub> → \*CO<sub>2</sub>

**Table S3 Contribution of zero point energies (ZPE) to the reaction free energy of different reaction steps in various systems. a-i denote different reaction steps. 1-5 denote different M@2DInSe systems.**

|          | $\Delta E_{ZPE}$ (eV) |       |      |      |       |       |      |      |      |      |      |       |      |       |      |
|----------|-----------------------|-------|------|------|-------|-------|------|------|------|------|------|-------|------|-------|------|
|          | a                     | b     | c    | d    | e     | f     | g    | h    | i    | j    | k    | l     | m    | n     | o    |
| <b>1</b> | 0.18                  | -0.02 | 0.21 | 0.13 | 0.19  | -0.09 | 0.22 | 0.07 | 0.1  | 0.19 | 0.13 | -0.06 | 0.00 | 0.00  | 0.04 |
| <b>2</b> | 0.20                  | 0.04  | 0.12 | 0.06 | 0.32  | -0.12 | 0.32 | 0.05 | 0.05 | 0.18 | 0.15 | -0.22 | 0.04 | -0.04 | 0.05 |
| <b>3</b> | 0.20                  | 0.03  | 0.12 | 0.12 | 0.25  | -0.01 | 0.27 | 0.05 | 0.07 | 0.14 | 0.15 | -0.08 | 0.11 | -0.11 | 0.09 |
| <b>4</b> | 0.19                  | -0.03 | 0.19 | 0.32 | -0.02 | 0.02  | 0.00 | 0.12 | 0.14 | 0.19 | 0.18 | -0.07 | 0.00 | 0.00  | 0.00 |
| <b>5</b> | 0.24                  | -0.01 | 0.14 |      |       |       |      |      |      |      |      |       |      |       |      |

1: Rh@2DInSe; 2: Mn@2DInSe; 3: Cu@2DInSe; 4: Cr@2DInSe; 5: Zn@2DInSe

a:  $*CO_2 + H^+ + e^- \rightarrow *COOH$ ; b:  $*COOH + H^+ + e^- \rightarrow *CO + H_2O$ ; c:  $*CO + H^+ + e^- \rightarrow *CHO$ ; d:  $*CHO + H^+ + e^- \rightarrow *CH_2O$ ; e:  $*CH_2O + H^+ + e^- \rightarrow *CH_3O$ ; f:  $*CH_3O + H^+ + e^- \rightarrow CH_4$ ; g:  $*CH_2O + H^+ + e^- \rightarrow *CH_2OH$ ; h:  $*CH_2OH + H^+ + e^- \rightarrow CH_3OH$ ; i:  $*CH_3O + H^+ + e^- \rightarrow CH_3OH$ ; j:  $*CO_2 + H^+ + e^- \rightarrow *HCOO$ ; k:  $*HCOO + H^+ + e^- \rightarrow *HCOOH$ ; l:  $*HCOOH \rightarrow * + HCOOH$ ; m:  $* + H^+ + e^- \rightarrow *H$ ; n:  $*H + H^+ + e^- \rightarrow H_2$ ; o:  $* + CO_2 \rightarrow *CO_2$

**Table S4 Contribution of enthalpic temperature correction (TS) to different reaction steps in various systems. a-i denote different reaction steps. 1-5 denote different M@2DInSe systems.**

|          | $-\Delta TS$ (eV) |       |      |      |       |       |       |       |       |      |      |       |      |       |      |
|----------|-------------------|-------|------|------|-------|-------|-------|-------|-------|------|------|-------|------|-------|------|
|          | a                 | b     | c    | d    | e     | f     | g     | h     | i     | j    | k    | l     | m    | n     | o    |
| <b>1</b> | 0.24              | -0.55 | 0.36 | 0.07 | 0.32  | -0.24 | 0.32  | -0.46 | -0.46 | 0.32 | 0.12 | -0.82 | 0.05 | -0.05 | 0.41 |
| <b>2</b> | 0.27              | -0.44 | 0.20 | 0.41 | -0.01 | -0.16 | 0.01  | -0.52 | -0.50 | 0.28 | 0.25 | -0.76 | 0.20 | -0.20 | 0.45 |
| <b>3</b> | 0.22              | -0.39 | 0.20 | 0.26 | 0.26  | -0.47 | 0.22  | -0.53 | -0.57 | 0.32 | 0.09 | -0.92 | 0.22 | -0.22 | 0.40 |
| <b>4</b> | 0.26              | -0.52 | 0.30 | 0.07 | -0.26 | -0.29 | -0.33 | -0.54 | -0.62 | 0.34 | 0.25 | -0.93 | 0.16 | -0.16 | 0.37 |
| <b>5</b> | 0.26              | -0.45 | 0.18 |      |       |       |       |       |       |      |      |       |      |       |      |

1: Rh@2DInSe; 2: Mn@2DInSe; 3: Cu@2DInSe; 4: Cr@2DInSe; 5: Zn@2DInSe

a:  $*CO_2 + H^+ + e^- \rightarrow *COOH$ ; b:  $*COOH + H^+ + e^- \rightarrow *CO + H_2O$ ; c:  $*CO + H^+ + e^- \rightarrow *CHO$ ; d:  $*CHO + H^+ + e^- \rightarrow *CH_2O$ ; e:  $*CH_2O + H^+ + e^- \rightarrow *CH_3O$ ; f:  $*CH_3O + H^+ + e^- \rightarrow CH_4$ ; g:  $*CH_2O + H^+ + e^- \rightarrow *CH_2OH$ ; h:  $*CH_2OH + H^+ + e^- \rightarrow CH_3OH$ ; i:  $*CH_3O + H^+ + e^- \rightarrow CH_3OH$ ; j:  $*CO_2 + H^+ + e^- \rightarrow *HCOO$ ; k:  $*HCOO + H^+ + e^- \rightarrow *HCOOH$ ; l:  $*HCOOH \rightarrow * + HCOOH$ ; m:  $* + H^+ + e^- \rightarrow *H$ ; n:  $*H + H^+ + e^- \rightarrow H_2$ ; o:  $* + CO_2 \rightarrow *CO_2$
